# Supplementary material for: Genetic Variation in the Feeding Behavior of Isofemale Lines of Nesidiocoris tenuis
Source: PubMed Central journal article supplement (PMC7469200; doi:10.3390/insects11080513), 2020-08-07
Supplement: insects-11-00513-s001.pdf [file insects-11-00513-s001.pdf]

**Table S1.** Number of replicates per isofemale line in each block and per leaf type tested in the phytophagy experiment. **One replicate consisted of one leaf enclosed in a muslin bag with ten *N. tenuis* adults (five males and five females).**

| Isofemale line                            | Leaf type | Block |   |   |   |   |   |   |   |   |    | Total replicates per leaf | Total replicates per isofemale line |
|-------------------------------------------|-----------|-------|---|---|---|---|---|---|---|---|----|---------------------------|-------------------------------------|
|                                           |           | 1     | 2 | 3 | 4 | 5 | 6 | 7 | 8 | 9 | 10 |                           |                                     |
| 1                                         | Young     | 2     | 1 | 2 | 2 | – | 3 | 3 | 1 | 2 | 1  | 17                        | 33                                  |
|                                           | Old       | 1     | 1 | 1 | 1 | 1 | 4 | 5 | 1 | – | 1  |                           |                                     |
| 5                                         | Young     | 1     | – | 1 | 1 | 1 | – | 1 | 3 | 2 | 1  | 11                        | 21                                  |
|                                           | Old       | 2     | 1 | 1 | 1 | – | – | – | 2 | – | 3  |                           |                                     |
| 6                                         | Young     | 1     | 1 | 2 | 1 | – | 1 | 2 | 3 | 2 | 2  | 15                        | 28                                  |
|                                           | Old       | 2     | 1 | 1 | – | 1 | 1 | 2 | 3 | 1 | 1  |                           |                                     |
| 8                                         | Young     | 2     | 1 | – | 1 | 1 | 2 | 2 | 3 | – | 1  | 13                        | 30                                  |
|                                           | Old       | 2     | 1 | 1 | 2 | 1 | 2 | 1 | 3 | 2 | 2  |                           |                                     |
| 10                                        | Young     | 2     | – | 2 | 2 | 1 | – | – | 1 | 2 | 2  | 12                        | 23                                  |
|                                           | Old       | 1     | 1 | 1 | 1 | 1 | 1 | – | 1 | 3 | 1  |                           |                                     |
| 11                                        | Young     | 1     | 1 | 1 | 1 | 1 | 1 | 1 | 3 | 1 | 2  | 13                        | 27                                  |
|                                           | Old       | 2     | – | – | 2 | 2 | 1 | 1 | 3 | 2 | 1  |                           |                                     |
| 13                                        | Young     | 1     | 2 | – | 2 | 1 | 1 | 2 | 1 | 2 | 1  | 13                        | 26                                  |
|                                           | Old       | 2     | – | 1 | 1 | 1 | 1 | 2 | 1 | 2 | 2  |                           |                                     |
| 14                                        | Young     | 2     | – | 1 | 1 | 1 | 1 | 1 | 3 | 1 | 1  | 12                        | 26                                  |
|                                           | Old       | 1     | 1 | 2 | 2 | 1 | – | – | 3 | 2 | 2  |                           |                                     |
| 15                                        | Young     | 2     | 1 | 1 | 2 | 1 | 1 | – | 3 | 2 | 2  | 15                        | 26                                  |
|                                           | Old       | 1     | 1 | 1 | 1 | – | – | 1 | 3 | 2 | 1  |                           |                                     |
| <b>Total replicates of the experiment</b> |           |       |   |   |   |   |   |   |   |   |    | <b>240</b>                |                                     |
